# Supplementary material for: Effect of LED Lighting Illuminance and Correlated Color Temperature on Working Memory
Source: Hindawi journal article supplement (doi:10.1155/2020/3250364), 2020-10-08
Supplement: f1 [file 3250364.f1.docx]

Data File

| 400lx 3000K | 400lx 5000K | 400lx 7000K | 1000lx 3000K | 1000lx 5000K | 1000lx 7000K | sex | age |
| --- | --- | --- | --- | --- | --- | --- | --- |
| 52 | 16 | 38 | 39 | 77 | 48 | 1 | 25 |
| 41 | 57 | 57 | 70 | 87 | 67 | 2 | 21 |
| 49 | 22 | 33 | 34 | 49 | 44 | 2 | 22 |
| 32 | 38 | 62 | 34 | 63 | 42 | 1 | 20 |
| 45 | 36 | 41 | 63 | 58 | 21 | 1 | 24 |
| 44 | 42 | 18 | 30 | 62 | 35 | 1 | 26 |
| 25 | 15 | 30 | 22 | 33 | 38 | 1 | 22 |
| 30 | 41 | 30 | 37 | 56 | 36 | 2 | 21 |
| 69 | 87 | 88 | 79 | 97 | 72 | 1 | 24 |
| 13 | 45 | 30 | 34 | 54 | 37 | 1 | 25 |
| 45 | 39 | 23 | 36 | 48 | 41 | 2 | 22 |
| 60 | 43 | 45 | 47 | 51 | 68 | 2 | 21 |
| 97 | 78 | 66 | 76 | 86 | 82 | 1 | 23 |
| 36 | 60 | 46 | 57 | 66 | 22 | 2 | 20 |
| 42 | 33 | 15 | 29 | 35 | 30 | 2 | 21 |
| 31 | 49 | 35 | 51 | 51 | 74 | 1 | 20 |
| 43 | 44 | 49 | 62 | 45 | 31 | 1 | 19 |
| 50 | 70 | 62 | 75 | 70 | 41 | 1 | 22 |
| 35 | 50 | 42 | 51 | 48 | 28 | 1 | 23 |
| 44 | 36 | 19 | 23 | 34 | 42 | 2 | 20 |
| 46 | 38 | 27 | 39 | 35 | 42 | 1 | 24 |
| 7 | 13 | 14 | 6 | 7 | 2 | 2 | 18 |
| 40 | 68 | 63 | 59 | 62 | 57 | 1 | 24 |
| 29 | 54 | 45 | 35 | 44 | 62 | 1 | 23 |
| 40 | 49 | 34 | 38 | 39 | 58 | 2 | 20 |
| 59 | 65 | 60 | 66 | 52 | 54 | 2 | 22 |
| 62 | 71 | 55 | 69 | 58 | 48 | 1 | 22 |
| 35 | 50 | 55 | 20 | 36 | 38 | 2 | 20 |
| 49 | 62 | 60 | 36 | 47 | 49 | 1 | 21 |
| 61 | 68 | 40 | 55 | 53 | 65 | 1 | 22 |

This data is the result of working memory measured under each lighting condition through experiments. The working memory was measured through n-back, and it is the number that responded correctly for 5 minutes.
